# Supplementary material for: Negative permittivity enhanced reflection and adsorption of electromagnetic waves from carbon fiber felt/carbon nanotubes
Source: Royal Society of Chemistry journal article supplement (doi:10.1039/d4tc02961e), 2024-01-01
Supplement: d4tc02961e1.pdf [file d4tc02961e1.pdf]

## Supporting information

### **Negative permittivity enhanced reflection and adsorption of electromagnetic waves from carbon fiber felt/carbon nanotubes**

Jingyu Bi, Zhihao Sun, Zihao Guo, Shaoyao Tian, Guangshen Li, Lei Qian\*

*Key Laboratory for Liquid-Solid Structural Evolution and Processing of Materials  
(Ministry of Education), Shandong University, 17923 Jingshi Road, Jinan, 250061,  
China*

\*Corresponding author, Email address: qleric@sdu.edu.cn (Lei Qian).

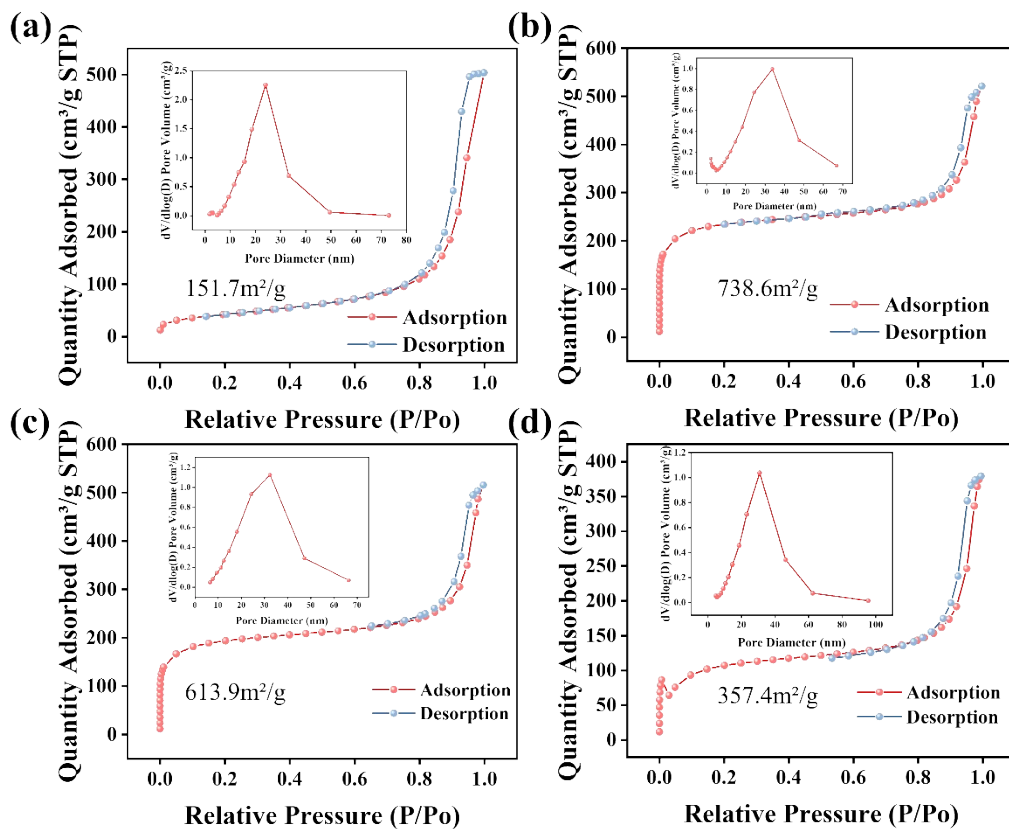

**Fig. S1.** Nitrogen adsorption-desorption isotherms and pore size distributions of (a) CNTs, (b) CFF, (b) CFF/CNTs-40 and (b) CFF/CNTs-66.

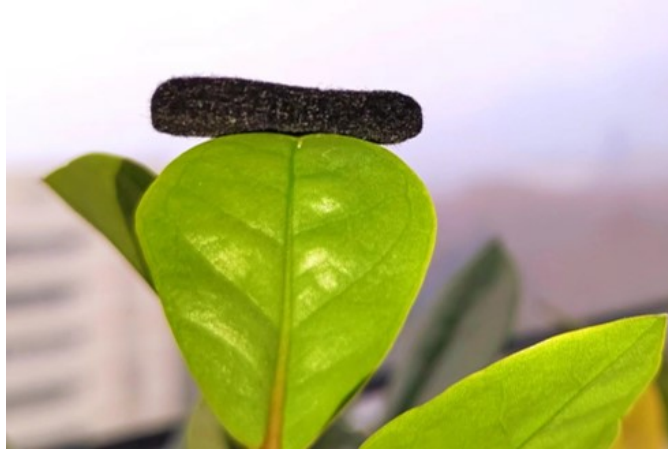

**Fig. S2.** Optical image of CFF/CNTs-40 on a grass leaf.

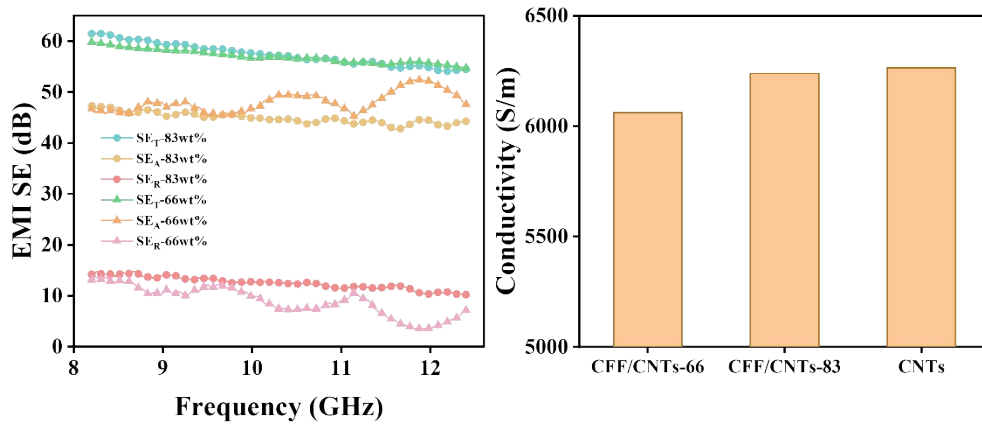

**Fig. S3.** (a) EMI SE of composites with CNTs concentrations of 66 wt% and 83 wt%,  
 (b) Conductivity of CFF/CNTs-66, CFF/CNTs-83 and CNTs

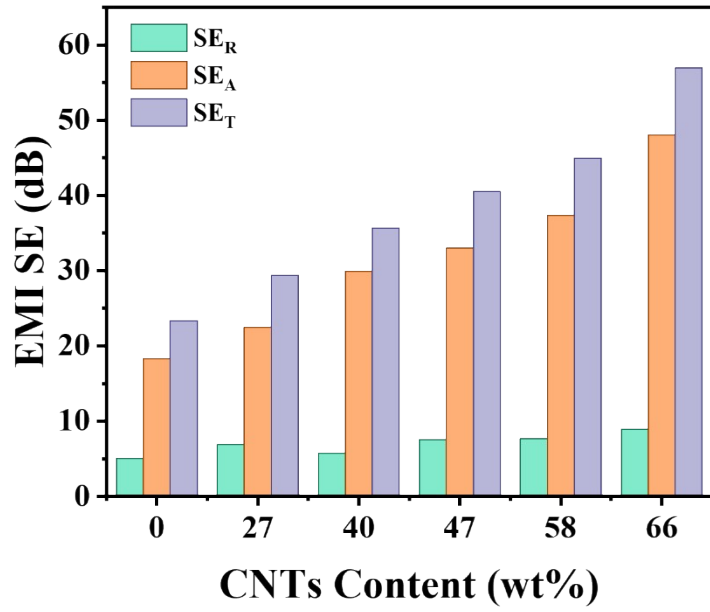

**Fig. S4.** Comparison of the average SE<sub>T</sub>, SE<sub>R</sub> and SE<sub>A</sub> of CFF/CNTs -x.

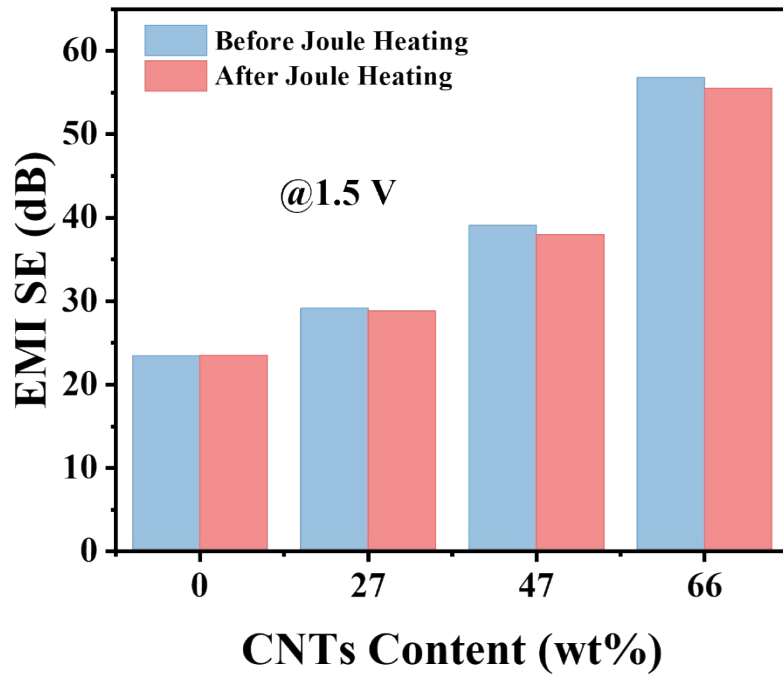

**Fig. S5.** Changes in EMI SE before and after joule heating of CFF/CNTs at 1.5V.
